# Supplementary material for: CCDC88B interacts with RASAL3 and ARHGEF2 and regulates dendritic cell function in neuroinflammation and colitis
Source: PubMed Central journal article supplement (PMC10781698; doi:10.1038/s42003-023-05751-9), 2024-01-10
Supplement: 42003_2023_5751_MOESM1_ESM.pdf [file 42003_2023_5751_MOESM1_ESM.pdf]

> **Rasal3**, mouse, Q8C2K5  
 MKPECGQTMFRTFWRSRDSAMDPLQSEEDSQTQPSLPSPLTSYRWHTGGSGEKAAGGFRWGRF  
 AGWGRALSHQEPMVNSQPAPRSLFRRVLSAPPKESRSNRLRFSKTLWGRHKNVAPLEPKPNKPAPE  
 PELELVADPDLPVAQIPEPPTPDMPVWNIDGFTLLEGKLVMLGEEEGPRQIRVGSASSENSMQAAL  
 GNLKDAVRTPGKTEPEAAGSNQVHNVRKLLKRLKEKKRAKSELGAYTPRDGPPSALGSRESLATS  
 ELDLGAERDVRVWVPLHPSLLGEPYCFQVWAGGSLCFSCRSSAERDRWIEDLRRQFQPSQDNVERQ  
 EMWLTVVVHHEAKGLPRATVPGVRAELWLDGALLARTAPRAGPGQLFWAERFHFALPPARRLSLRL  
 RSAGPAGATVGRVLELDEVSI PRAPAAGLERWFPVLGAPAGAVLRARIRVRCRLVLPSERYKELA  
 EFLTFHYARLCGALEPALSQAQAEELAAAMVRVLRATGRAQALVTDLGTAEALARCGGREALLFREN  
 TLATKAIDEYMKLVAYEYLQDTLQGVVRCLESTEDCEVDPSKCPTPELPHKQARLRDSCEEVFEN  
 IHSYCNCFPAELGVSFSSWREACKARGSEALGPRLVCASLFLRLLCPAILAPSLFGLAPEHPAPGP  
 ARTLTLIKVIQNLANCAPFGEKEAYMAFMNSFLEDHGPAMQHFLDQVATVDADTTPSGYQGSGLD  
 ALQLAVLHVQLCTIFAEALDQKTDQDSLEPLPTILRAIEEGRFVPSVPMRLPRISTQVQSFFSGEK  
 PGFLAPRDLPKHTPLISKSSQLRSFQAGSWASRRPDEERQRRPRPVLRTQVSPARRPTHRPSA  
 GSKPRPKGSLRMGPAPCGRAWTRASASLPRKPSVFWQRQMDQPGDRYQTTGTHRVPVGLAEIQCEV  
 AIFREAAKALSLLVLESLSTVQALKEQEHFRCQLQDLYSRLGAGI SKLDSKGGPLPSNGSHRLKSL  
 EQRLTEMECSQDQLRDSLQSLQLLSKTPGSRSQPLPKAPCVNGADLSMGT

Experiment #1  
 % Coverage = 38%  
 # Unique peptides = 49

Experiment #2  
 % Coverage = 56%  
 # Unique peptides = 55

> **Arhgef2**, mouse, Q60875  
 MSRIESLTRARIDRSKEQATKTREREKMKKADARYTNGHLFTTISVSGMTMTCYACNKSITAKEA  
 LICPTCNVTIHNRCCKDTLANCTKVQKQQAALLRNNTALQSVSLRSKTTTRERPTSAYPSDSF  
 RQSLLGSRRLGLSSLSLAKSVSTNIIAGHFNDSEPLGLRQLLSQSTDSLNMNRNRTLSVESLIDEGV  
 EVFYNELMSDFEMDEKDFEADSWSLAVDSSFLQHQKKEVMKQDVIYELIQTELHHVRTLKIMTR  
 LFRTGMLEELQMEPEVVQGLFPCVDELSDIHTRFLNQLLERRRQALCPGSTRNFVIHRLGDLIS  
 QFSGSNAEQMRKTYSEFCSRHTKALKLYKELYARDKRFQFIRKMTRSVAVLKRHGVQECILLVTQ  
 RITKYPVLINRILQNSHGVEEYQDLASALGLVKELLSNVDQDVHELEKEARLQEIYNRMDPRAQ  
 TPVPGKPPFGRDELRLRKLHEGCLLWKTATGRFKDVLVLLMTDVLVFLQEKDQKYIFTSLDKPS  
 VVSLQNLIVRDIANQAKGMFLISSGPEMEYEVHAASRDDRTTWIRVIQQSVRLCPSREDFPLIET  
 EDKAYLRRIKTKLQKNQALVELLQKNVELFAEMVHFQALKAGFVGMPPPALPRGLFRLESFESL  
 RGERLLKDALREVEGLKDLLLGPVCLPMTSREPALPLDSDSGSCPGVTANGEARTFNGSIELCR  
 ADSDSQKDRNGNQLRSPQEEVLQPLINLYGLLHGLQAVVVQERLMEALFPEGPERWEKLSRAN  
 SRDGEAGRAAVASVTPEKQATELALLQRQHTLLQEELRRCQRLGEEERATEAGSLEARLRESEQAR  
 ALLEREAEEIRRQLAALGQNEPLPAEAPWARRPLDPRRRSLPAGDALYLSFNPPQPSRGHRLDL  
 PVTVRSLSLHREFDDREAQELGSPEDRLQDSSDPDTGSEEEVSSRSLSPHSPRDFTRMQDIPEETES  
 RDGEPTASES

Experiment #1  
 % Coverage = 40%  
 # Unique peptides = 45

Experiment #2  
 % Coverage = 45%  
 # Unique peptides = 38

**Supplemental Figure 1. Protein Coverage and Unique Peptides Count of the Top Candidate CCDC88B Interactors.** RASAL3 and ARHGEF2 were identified as the top CCDC88B candidate interactors by co-IP followed by LC-MS/MS as described in **Figure 1**. Their protein sequences are shown and the highlighted regions correspond to the sequence coverage by LC-MS/MS identified peptides from thymus and BI-141 T-cell line. The percentage of protein sequence coverage along with the number of unique peptides identified in two independent LC-MS/MS experiments are provided.

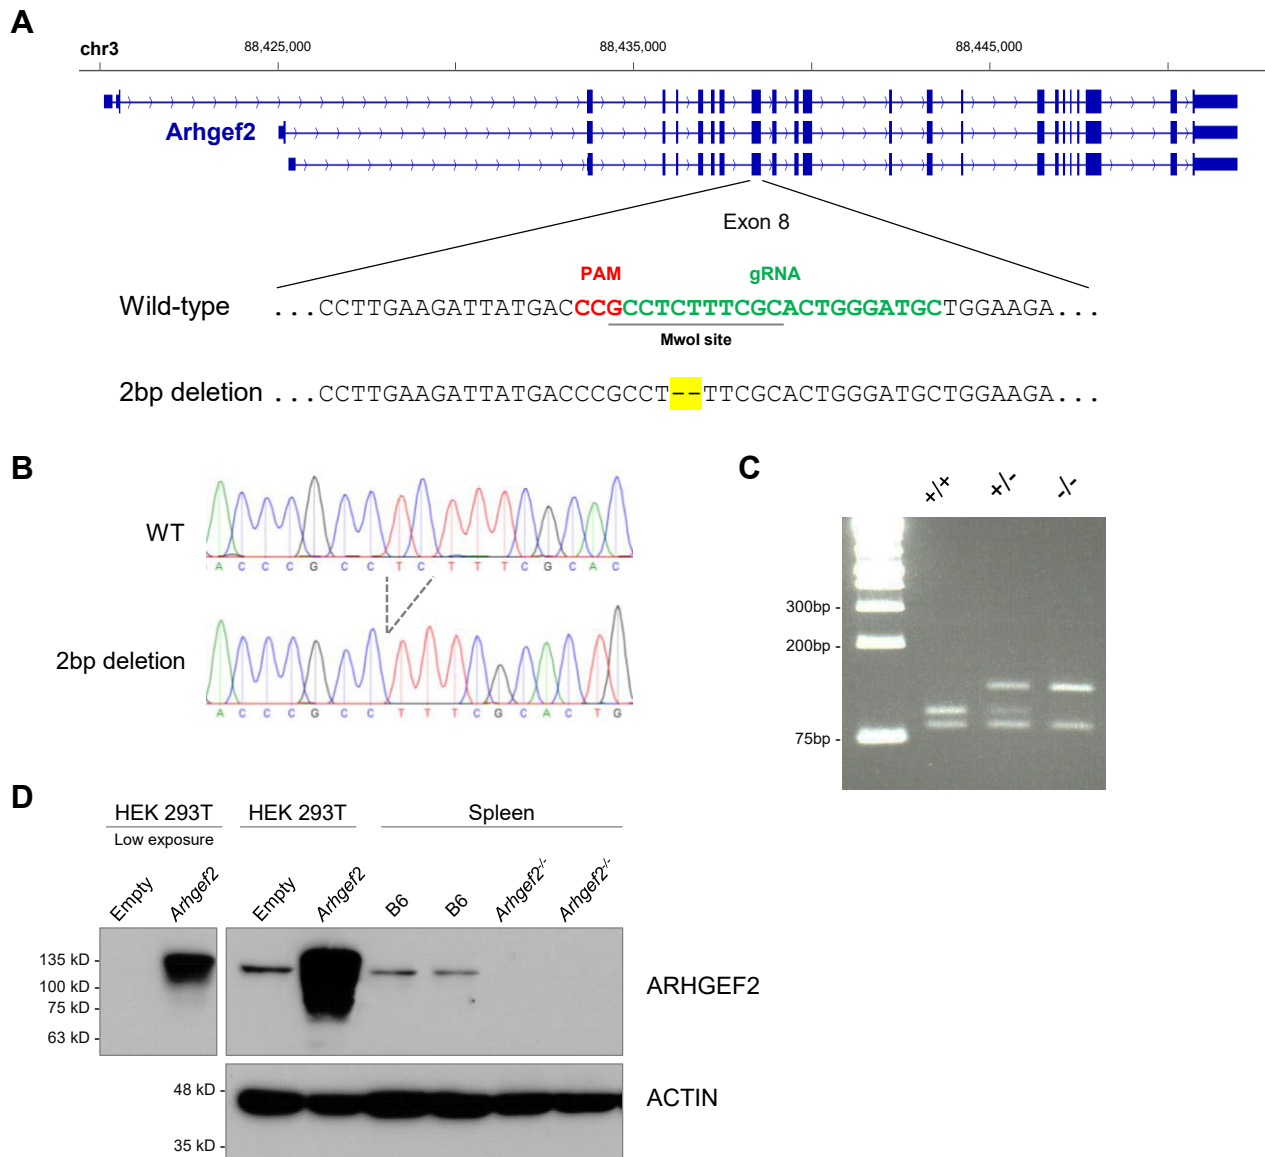

**Supplemental Figure 2. Generation of *Arhgef2* Mutant Mice.** (A) Strategy to generate the null allele at the *Arhgef2* gene. Cas9 cleavage guided by a sgRNA targeting exon 8 of *Arhgef2* created a two base pair deletion, bringing the coding sequence out of frame and creating an early stop codon. (B) Targeted sequencing profile showing the 2bp deletion in homozygous *Arhgef2* mutant mice. (C) The 2bp deletion abrogates a *MwoI* restriction site and is used for genotyping by PCR and digestion. (D) Western blot performed for ARHGEF2 and ACTIN on total protein extracts from spleen of two control B6 and *Arhgef2*<sup>-/-</sup> mutant mice. Protein extracts from HEK293T cells transfected with empty pcDNA3.1 or with expressing vector for mouse *Arhgef2*-3xFlag construct were analyzed by immunoblotting.

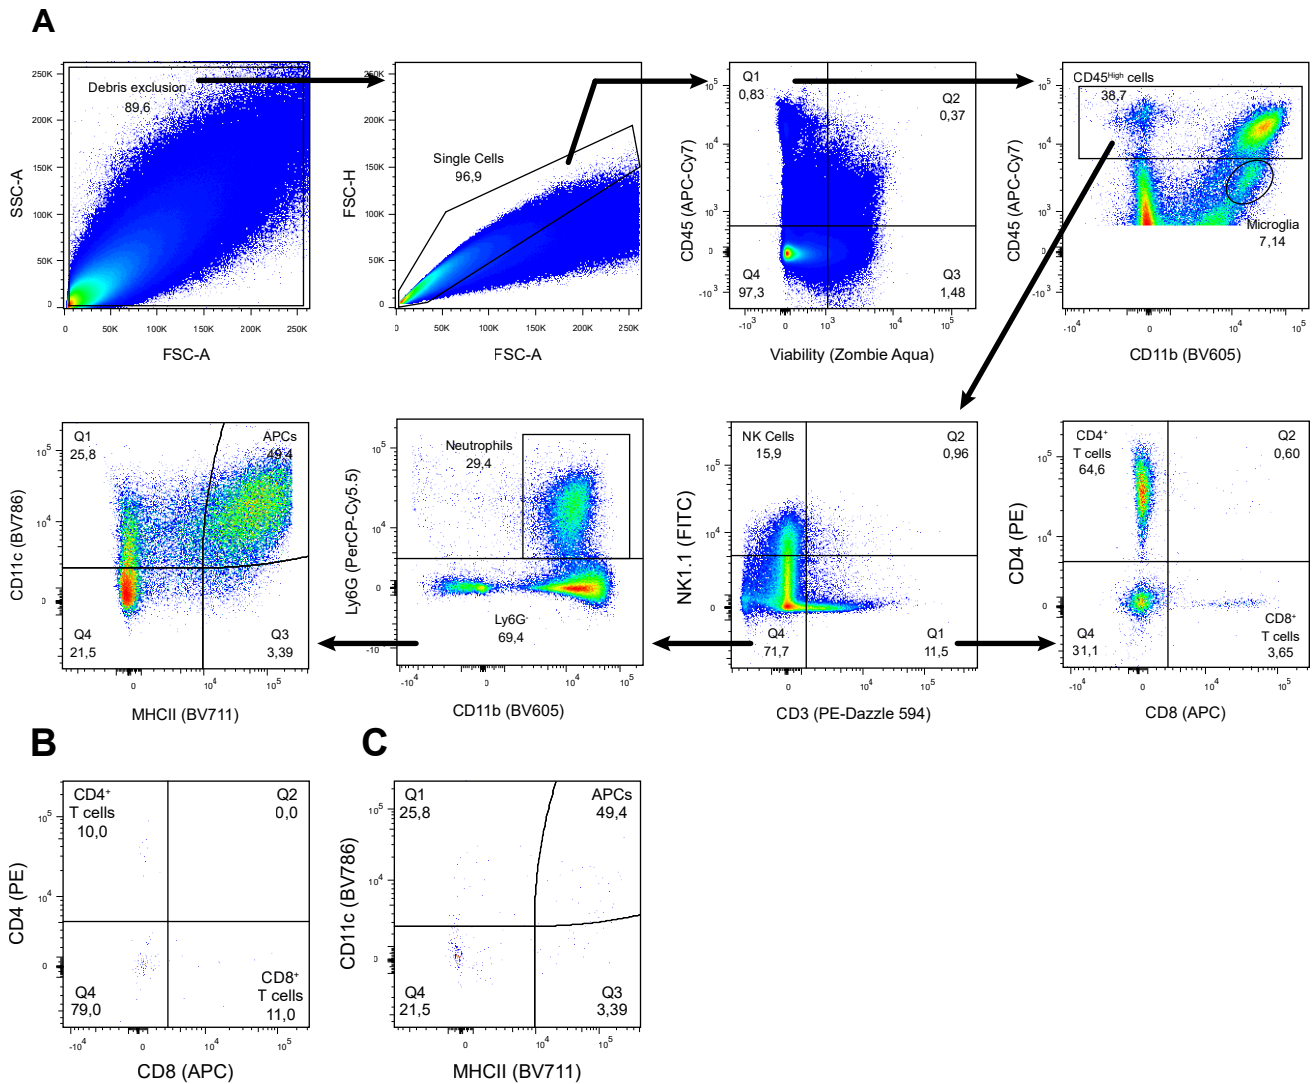

**Supplemental Figure 3. Additional Flow Cytometry Data for Spinal Cord. (A)** Gating strategy used in **Fig. 3G-3H** for spinal cord immune cells infiltration. **(B-C)** Flow cytometry for total CD45<sup>+</sup>CD3<sup>+</sup>CD4<sup>+</sup> T cells **(B)** and total CD45<sup>+</sup>CD11c<sup>High</sup>MHCII<sup>High</sup> antigen presenting cells **(C)** in control B6 spinal cord.

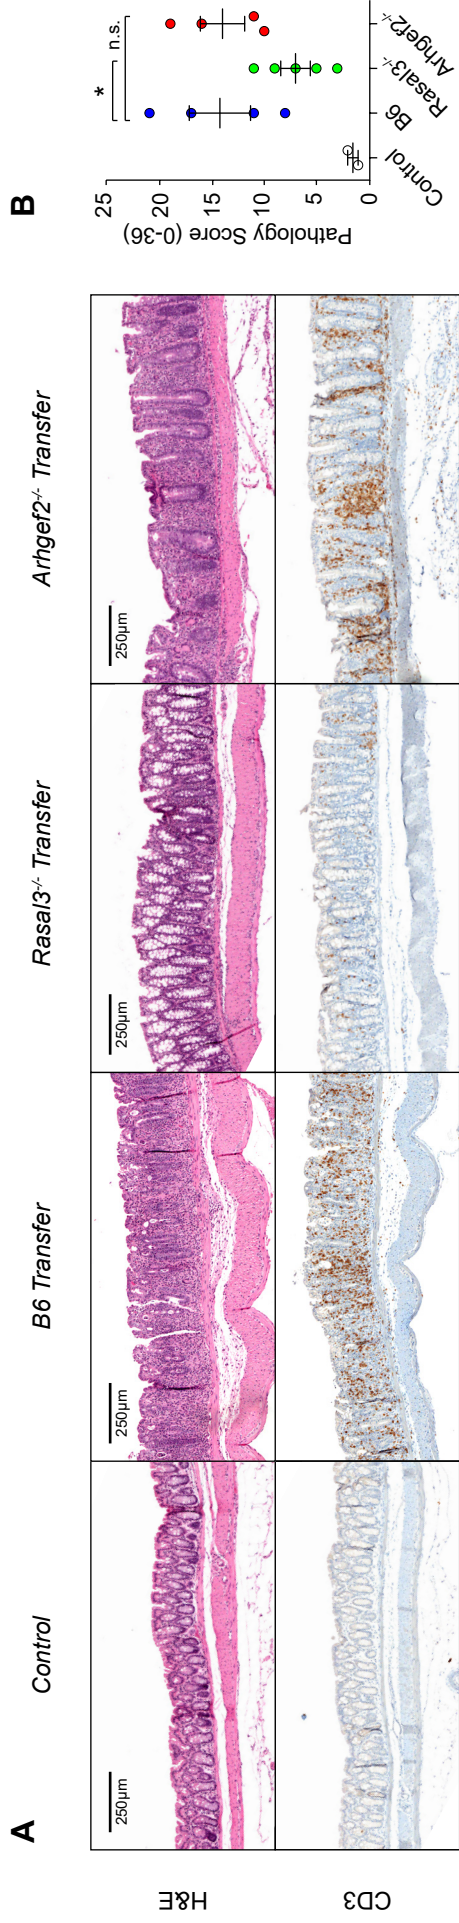

**Supplemental Figure 4. Rasa13<sup>-/-</sup> CD4<sup>+</sup> T cells do not induce colitis in immunocompromised mice. (A-B)** CD4<sup>+</sup> CD25<sup>-</sup>CD45RB<sup>hi</sup> T cells ( $4 \times 10^6$ ) from B6 or from Rasa13<sup>-/-</sup> mice were transferred into Rag1<sup>-/-</sup> mice and colons were harvested 7 weeks later. (A) Hematoxylin and eosin staining (top) or immunohistochemistry staining for CD3 (bottom) of colon sections after transfer of B6, Rasa13<sup>-/-</sup> and Arhgef2<sup>-/-</sup> CD4<sup>+</sup> T cells. Data are representative of at least 4 colons per group. Control: Rag1<sup>-/-</sup> mice without T cells transfer (B) Pathology scores evaluating inflammatory cell infiltration, submucosal edema, gland loss and surface epithelial erosion/ulceration (mean  $\pm$  SEM; n.s.: non-significant, \*P < 0.05; two-tailed Student's t-test).



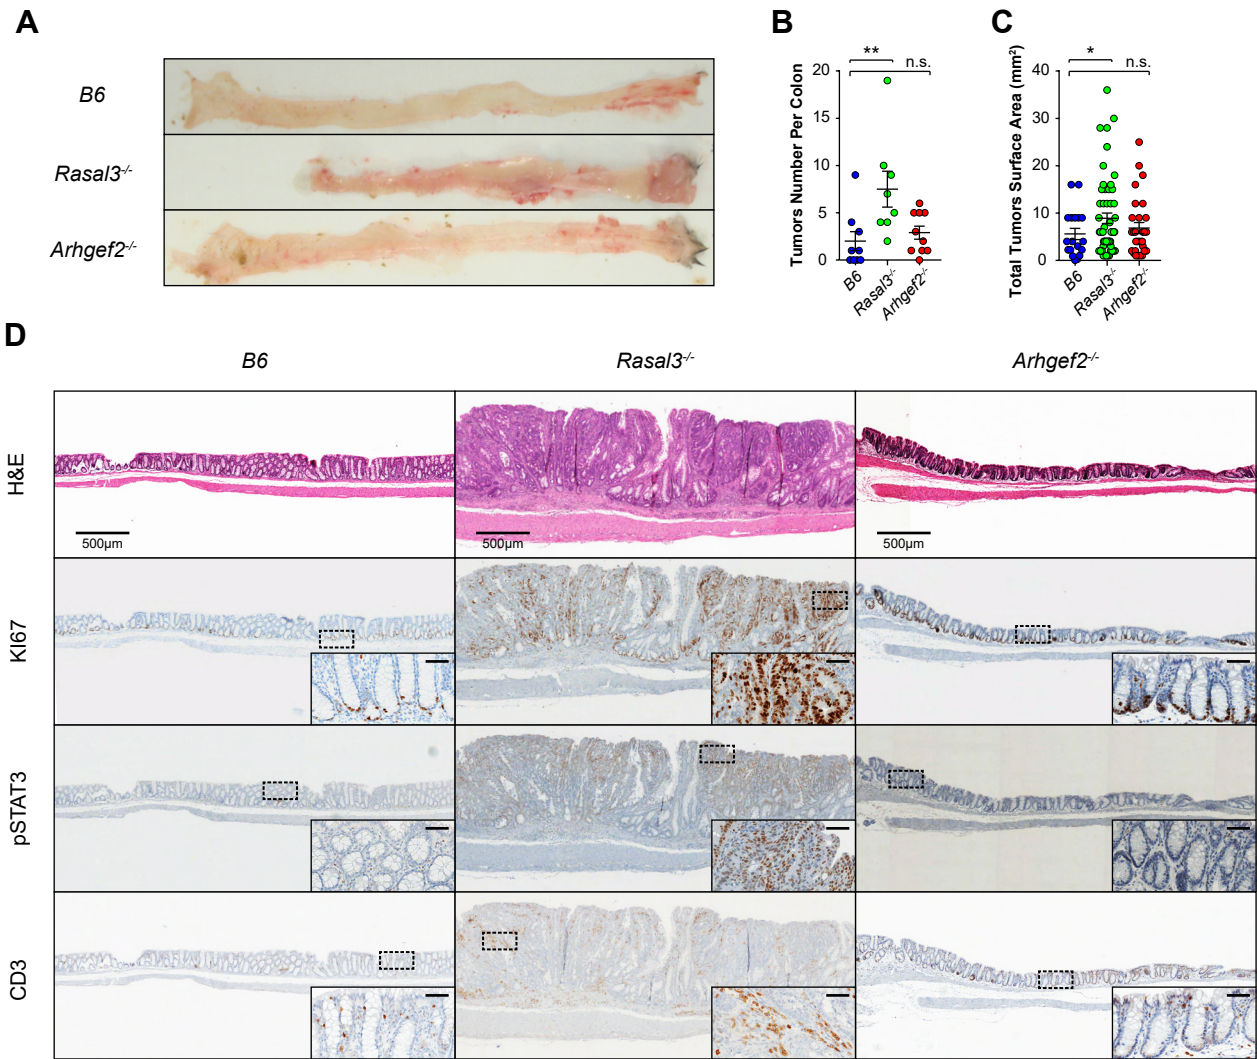

**Supplemental Figure 5. Loss of RASAL3 Exacerbates Susceptibility to Colitis-Associated Colorectal Cancer (A-D)** B6, *Rasal3*<sup>-/-</sup> and *Arhgef2*<sup>-/-</sup> mice were treated with azoxymethane (AOM) 7 days prior to 3 cycles of 2% DSS for 4 days at the indicated weeks. **(A)** Representative images of colons from B6, *Rasal3*<sup>-/-</sup> and *Arhgef2*<sup>-/-</sup> mice after 14 weeks. **(B-C)** Quantification of effect of treatment on the absolute number of tumors and the total tumors surface area, respectively (means  $\pm$  SEM; n.s.: non-significant, \* $P < 0.05$ , \*\* $P < 0.01$ ; two-tailed Student's t-test). Data from **A** to **C** are representative of 3 independent experiments. **(D)** Immunohistochemistry staining of colons of B6, *Rasal3*<sup>-/-</sup> and *Arhgef2*<sup>-/-</sup> mice at 14 weeks for the indicated markers. Inserts show magnification of regions of interest indicated by the dashed lines. Insert bar: 50 $\mu$ m. Data are representative of at least 3 colons per group.

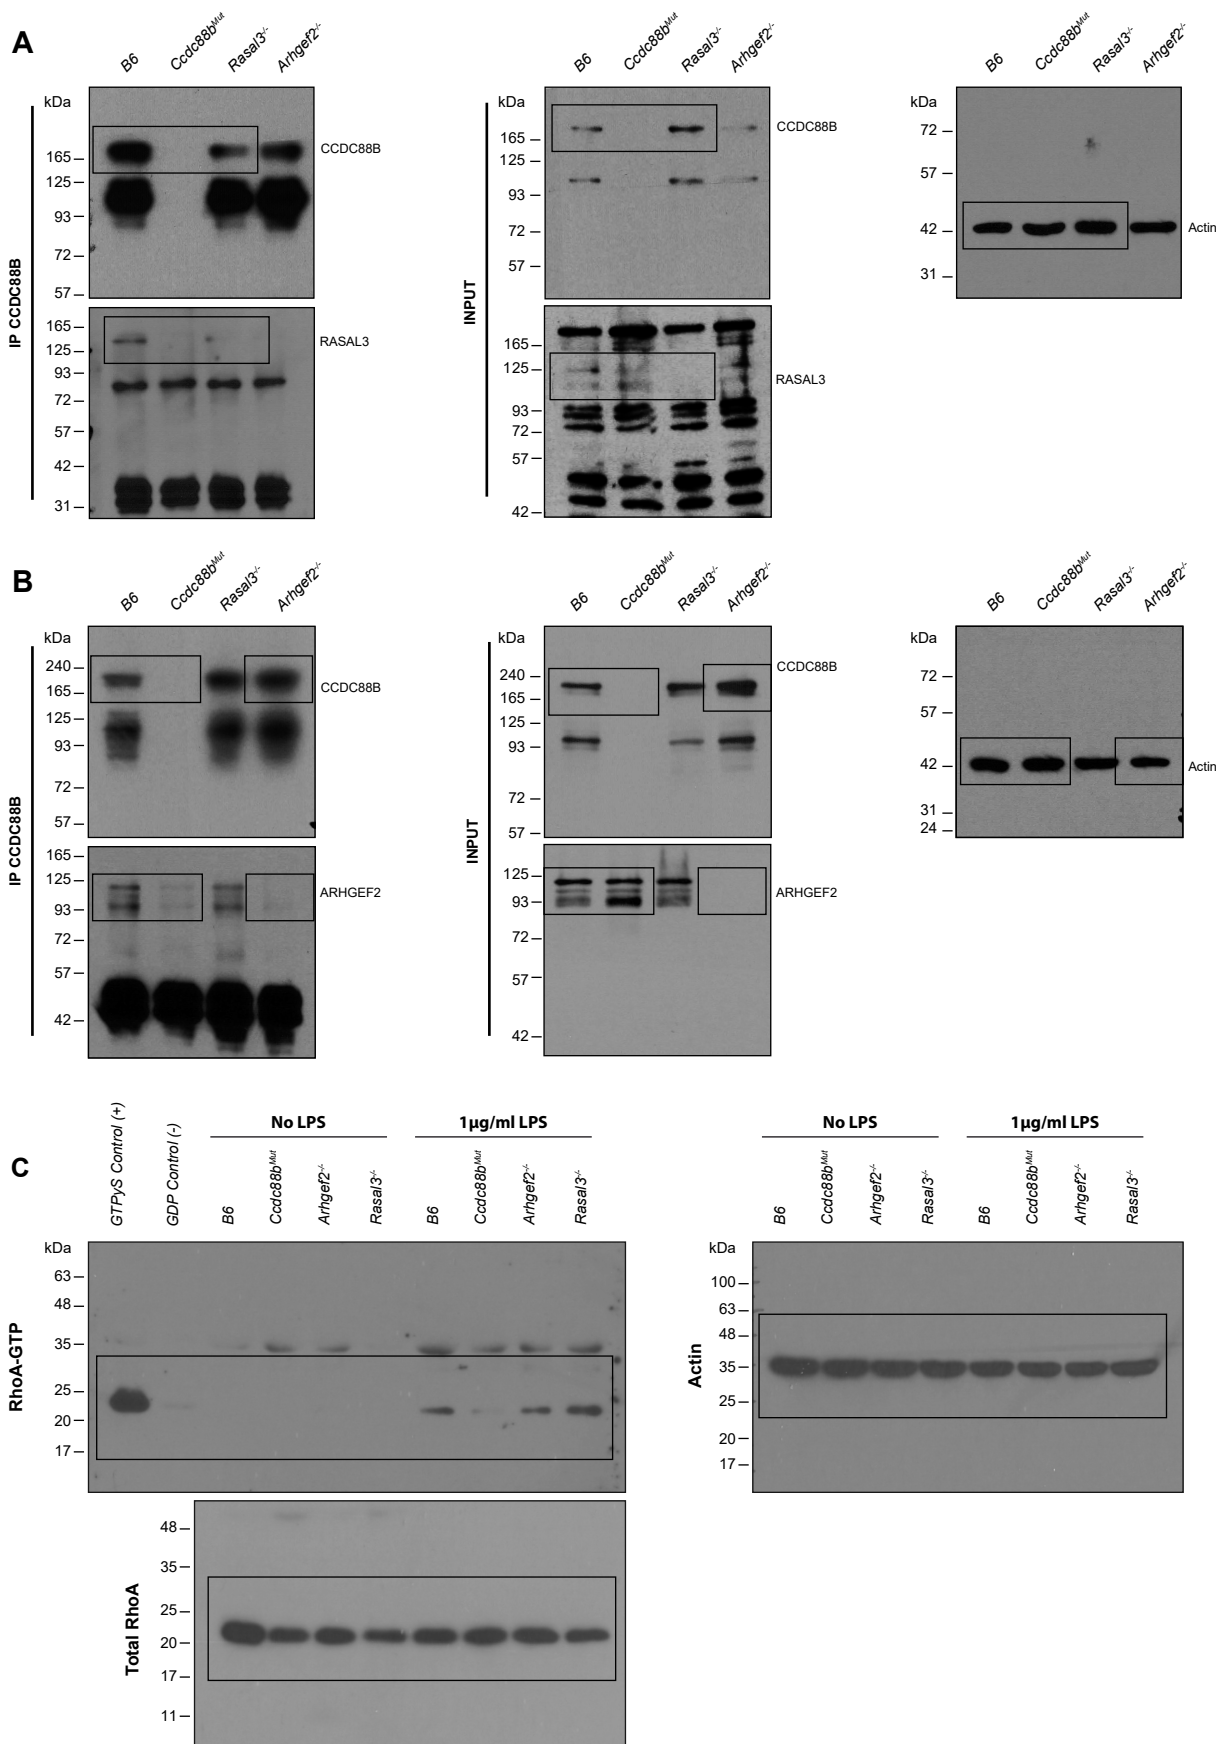

**Supplemental Figure 6. Original Immunoblots for analyses. (A-B)** From Fig. 6E-F, lysates from B6, *Ccdc88b<sup>Mut</sup>*, *Rasal3<sup>-/-</sup>* and *Arhgef2<sup>-/-</sup>* BMDCs were immunoprecipitated with an anti-CCDC88B polyclonal antiserum, and RASAL3 or ARHGEF2 proteins were detected by immunoblotting, respectively **(C)** From Fig. 7F, BMDCs generated from B6, *Ccdc88b<sup>Mut</sup>*, *Rasal3<sup>-/-</sup>* and *Arhgef2<sup>-/-</sup>* mutants were stimulated with LPS and protein lysate analyzed for the level of active RhoA-GTP using Rhotekin-RBD (Rho Binding Domain) beads. Identified rectangles represent the cropped image in the corresponding figure; each Western Blot is representative of 2 independent experiments.
